# Supplementary material for: CRKL regulates alternative splicing of cancer-related genes in cervical cancer samples and HeLa cell
Source: Springer Nature journal article supplement (doi:10.1186/s12885-019-5671-8), 2019-05-27

Con

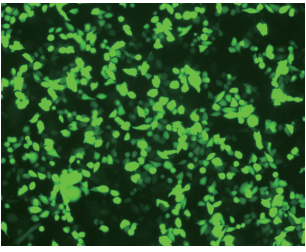

CRKL (KD)

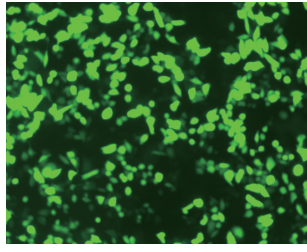

Supplement: MOESM3 [file 16753018]
